# Supplementary material for: Temperature‐related geographical shifts among passerines: contrasting processes along poleward and equatorward range margins
Source: PubMed Central journal article supplement (PMC6102530; doi:10.1002/ece3.1683), 2015-10-20
Supplement: ECE3-5-5162-s001.pdf [file ECE3-5-5162-s001.pdf]

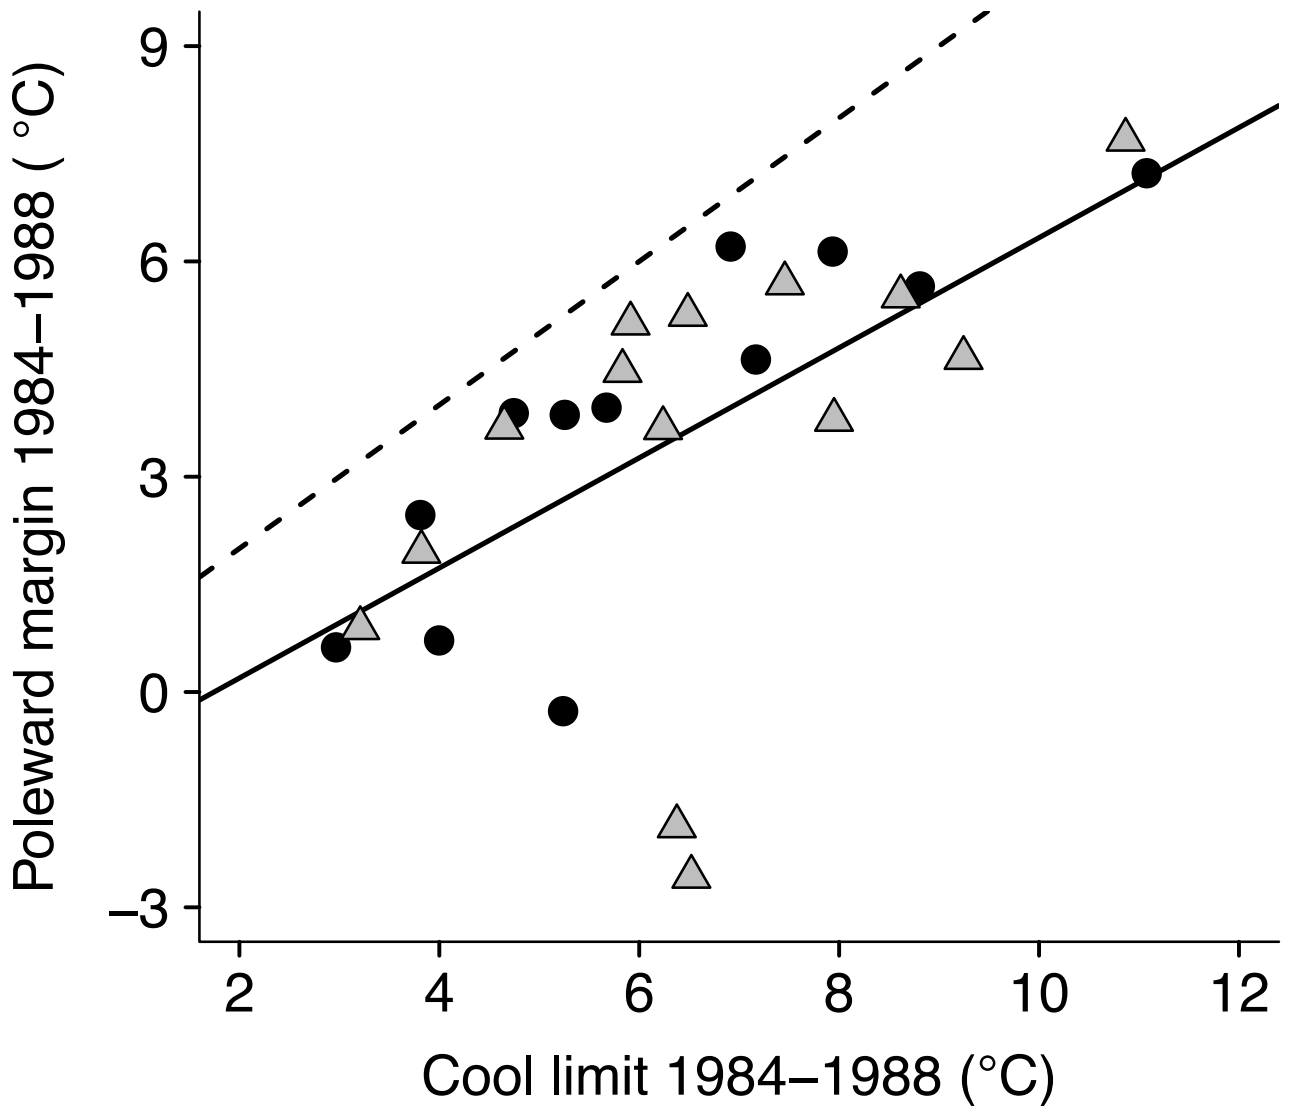

Figure S1a

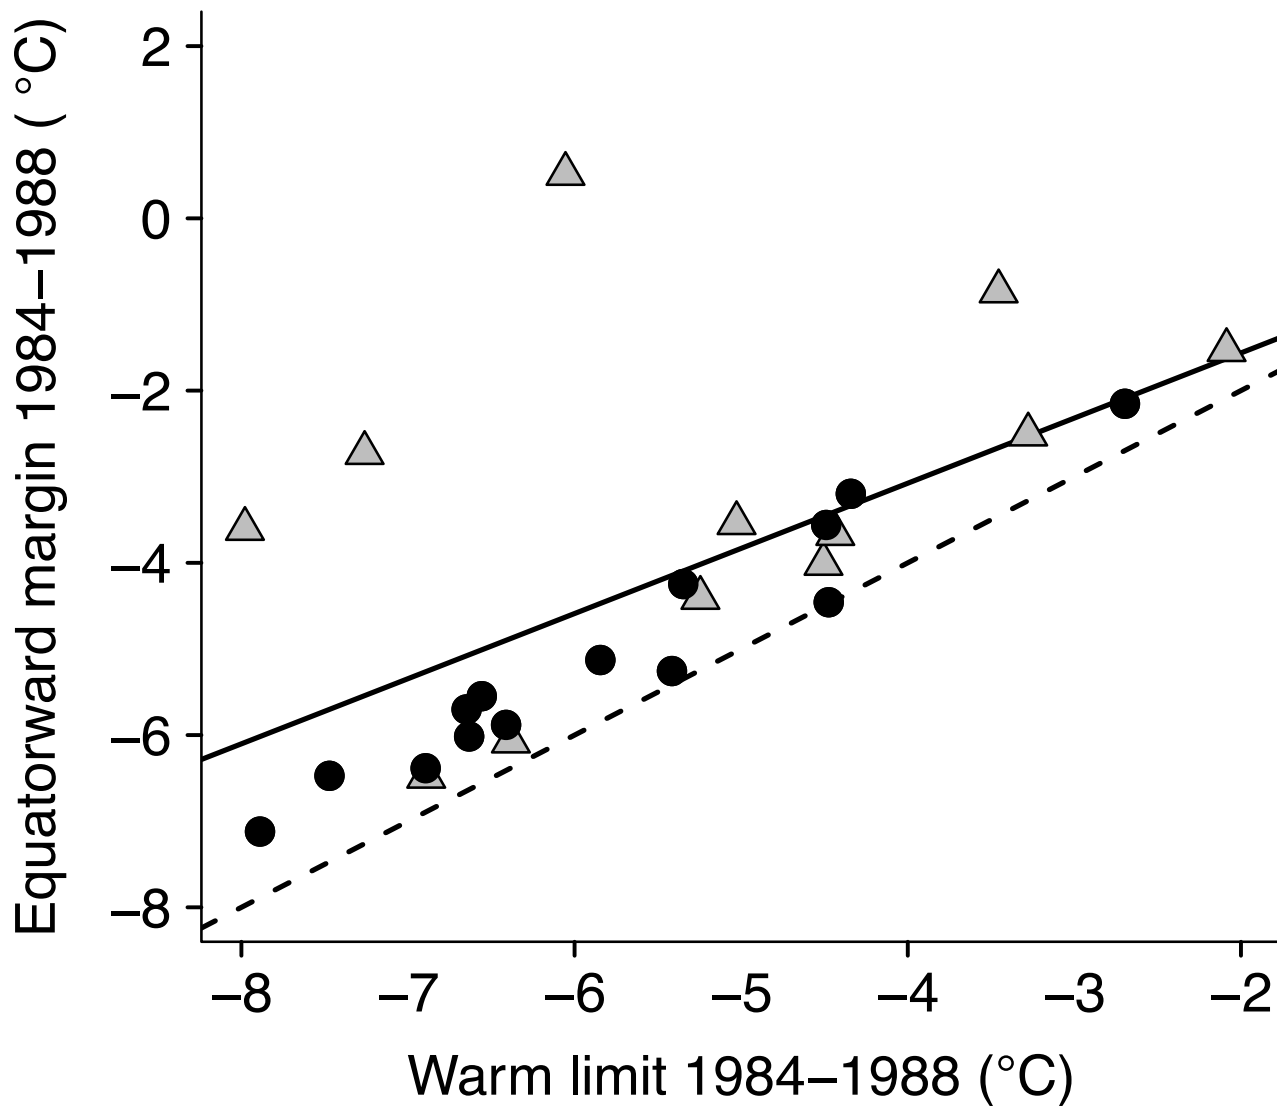

Figure S1b

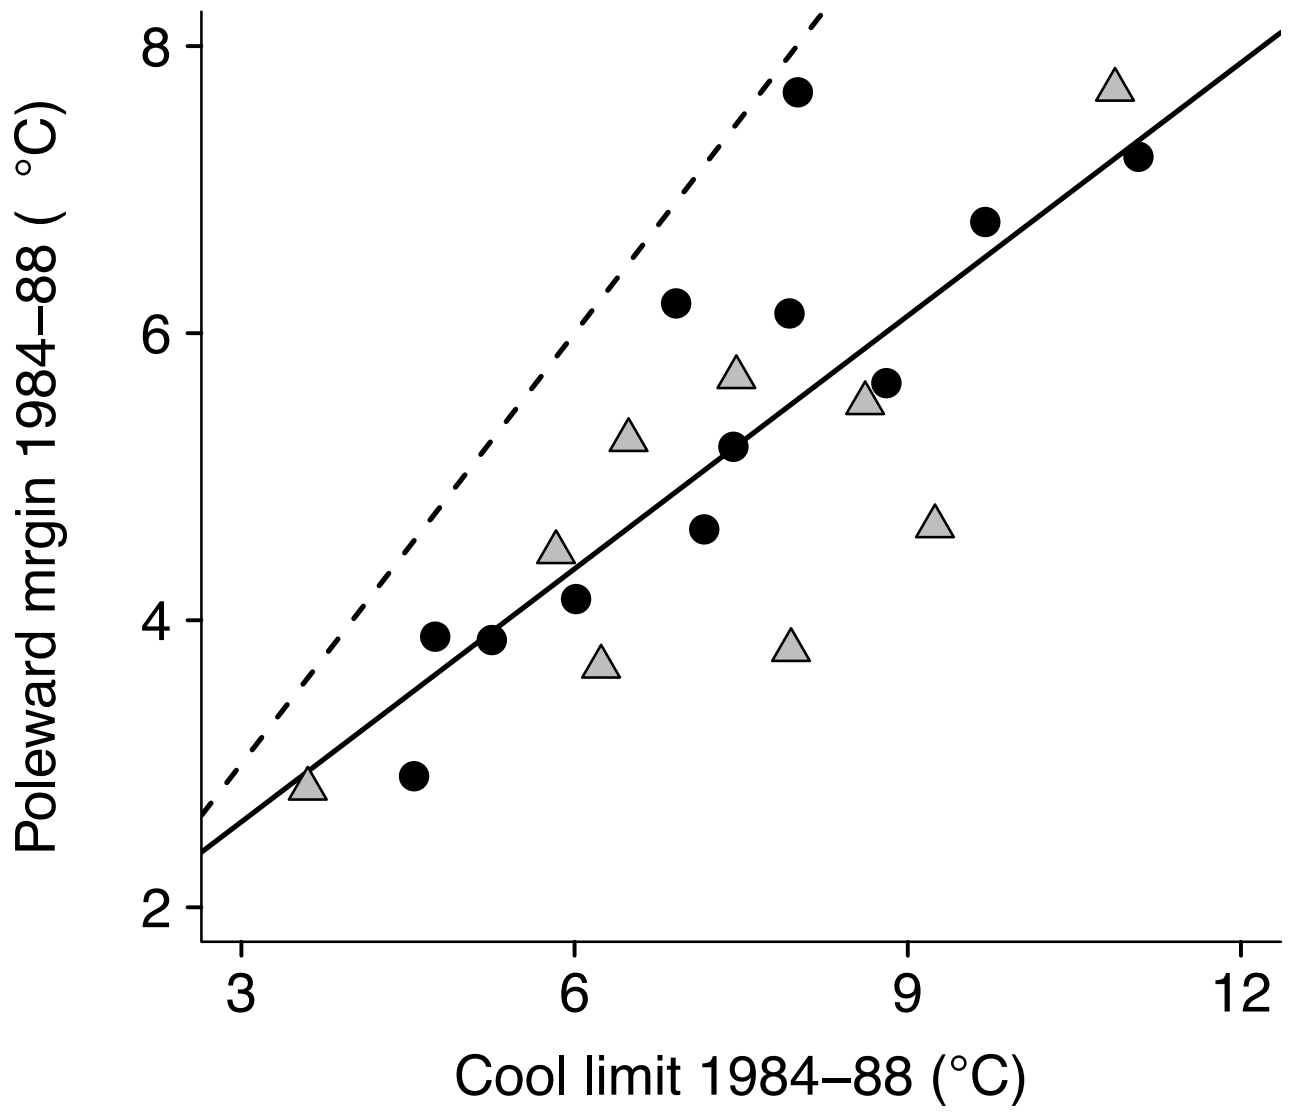

Figure S1c

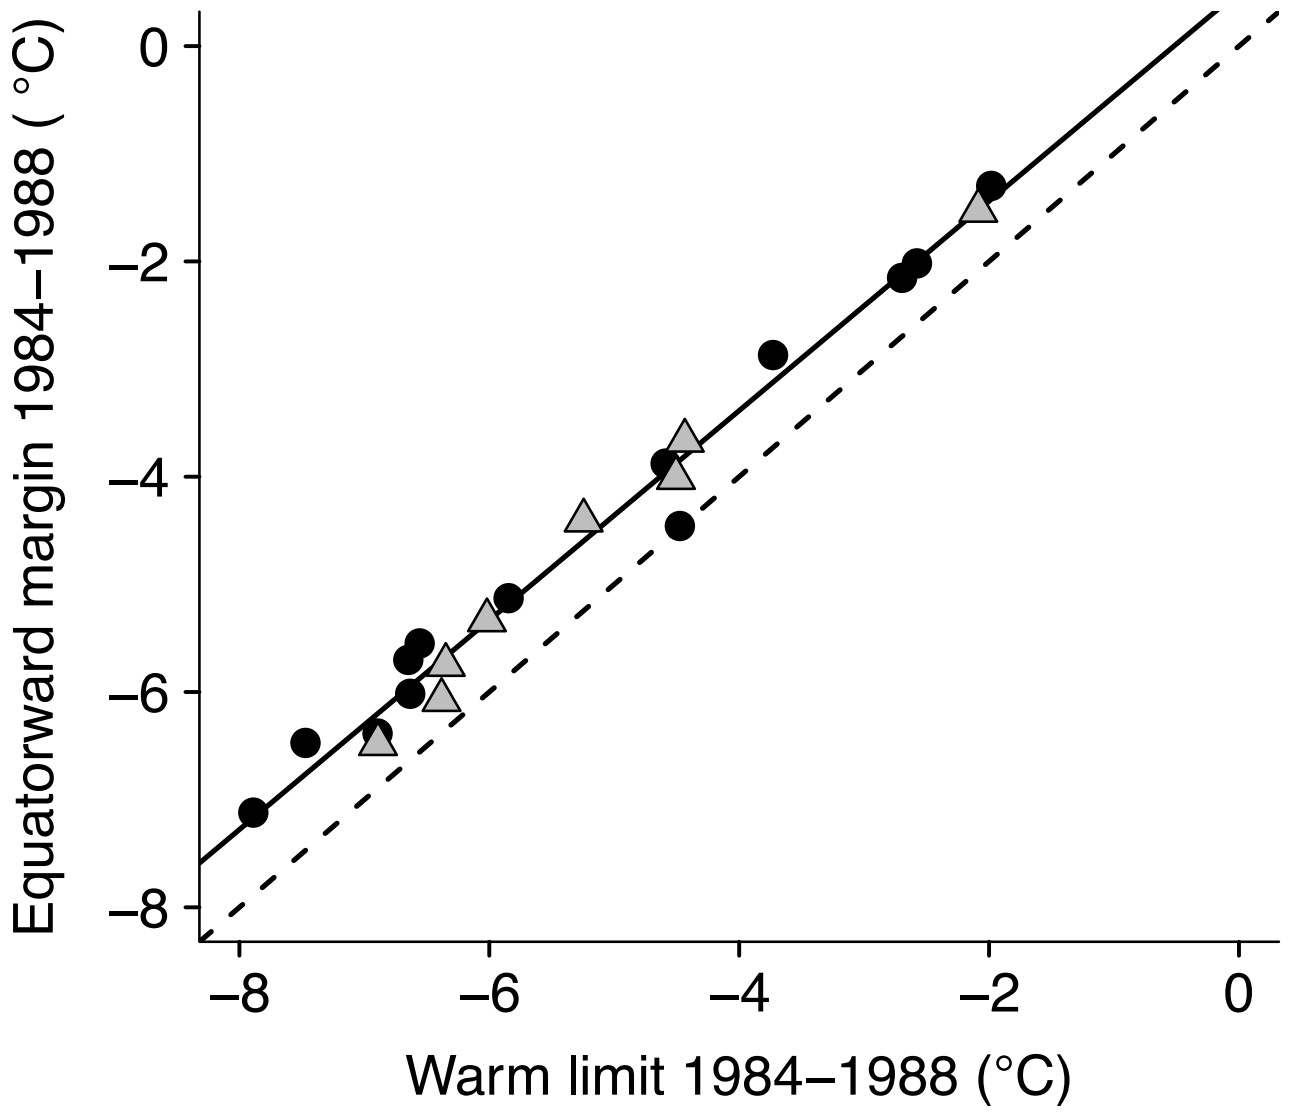

Figure S1d

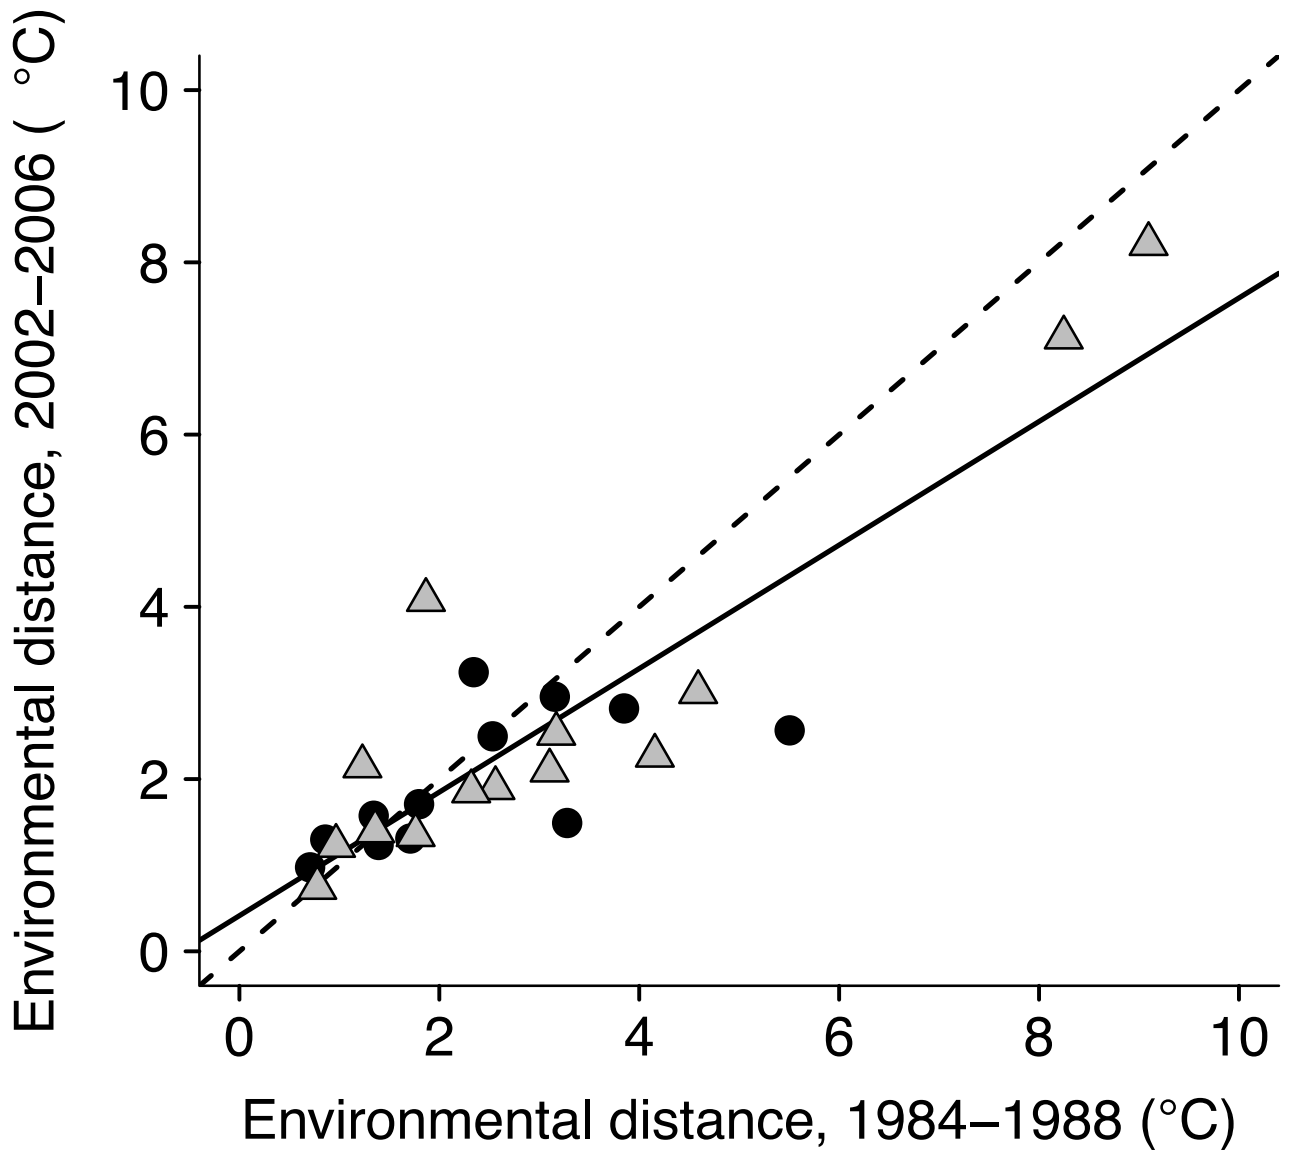

Figure S2a

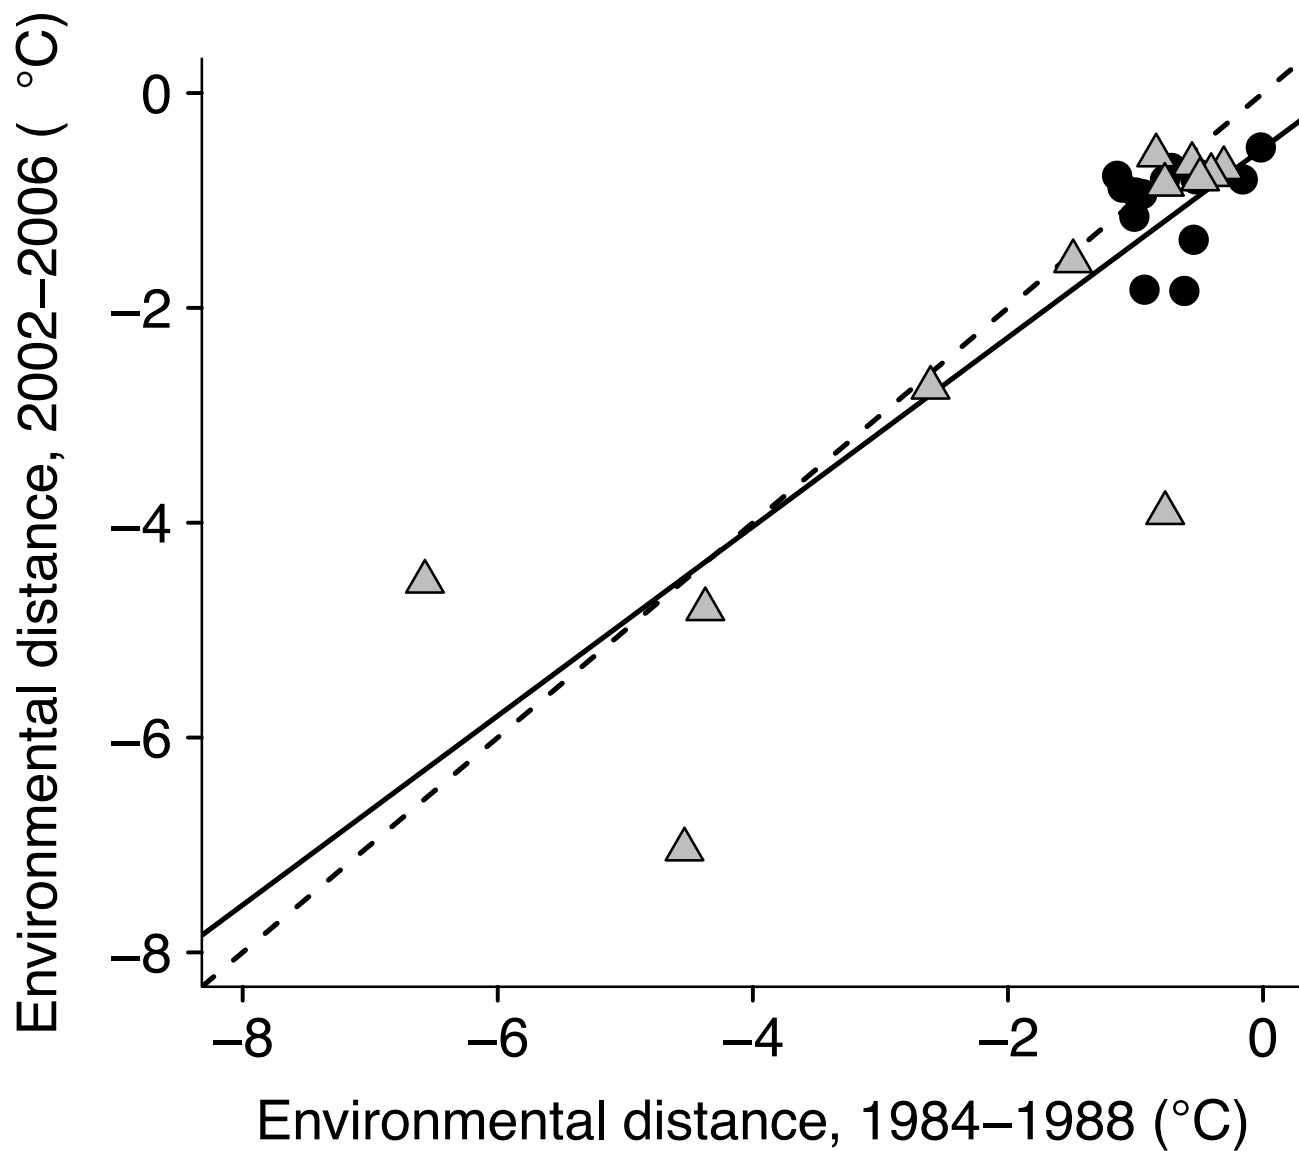

Figure S2b

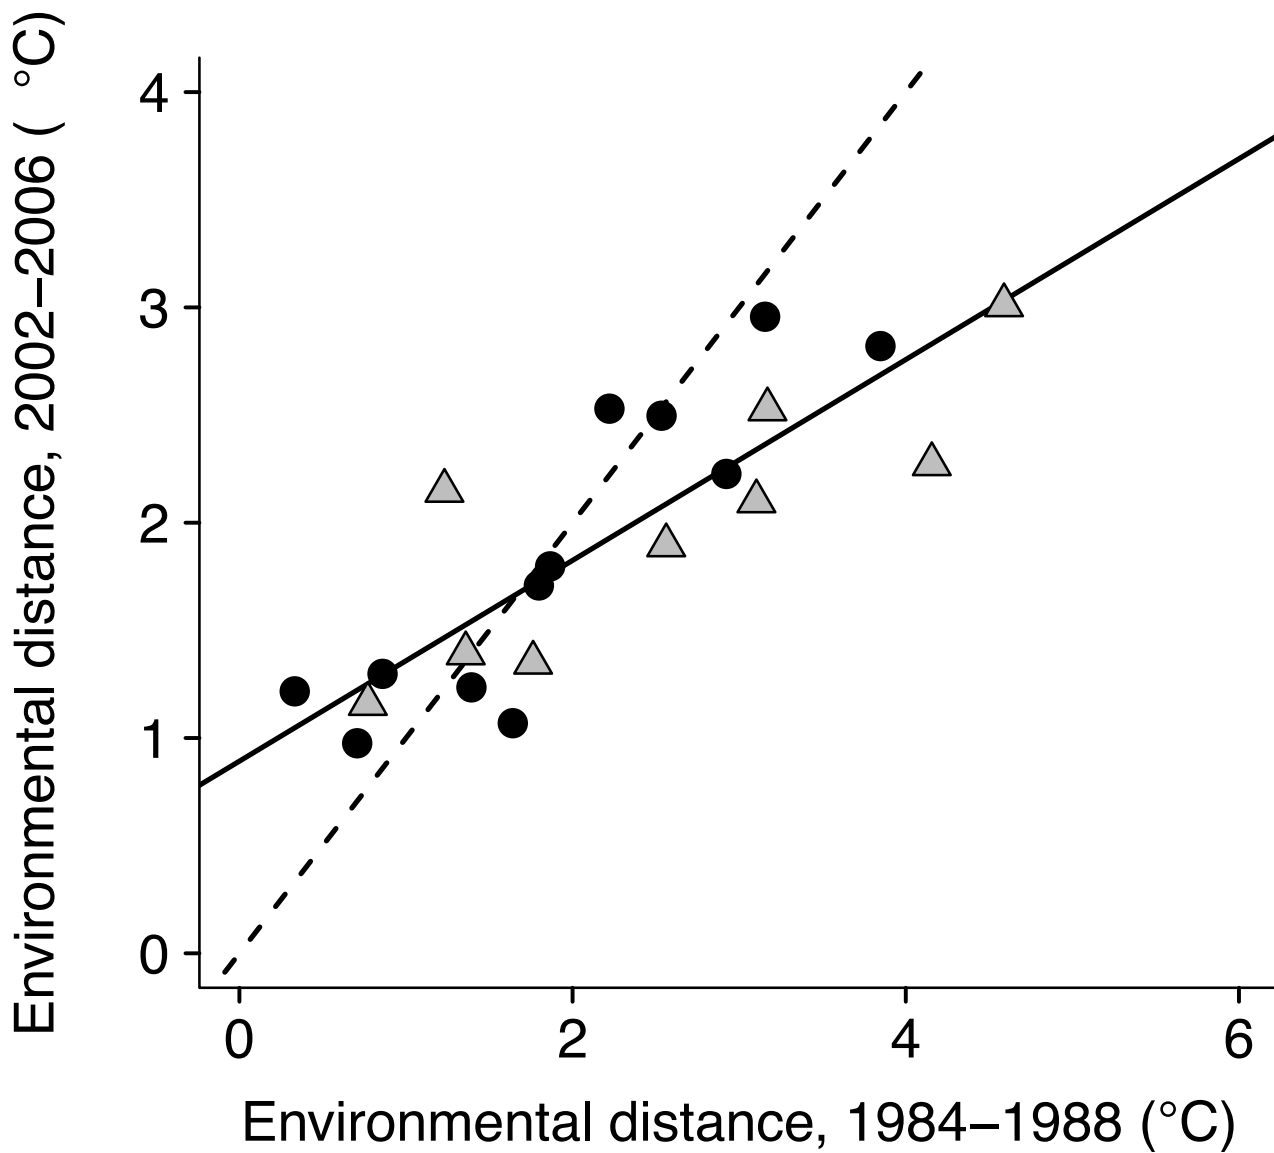

Figure S2c

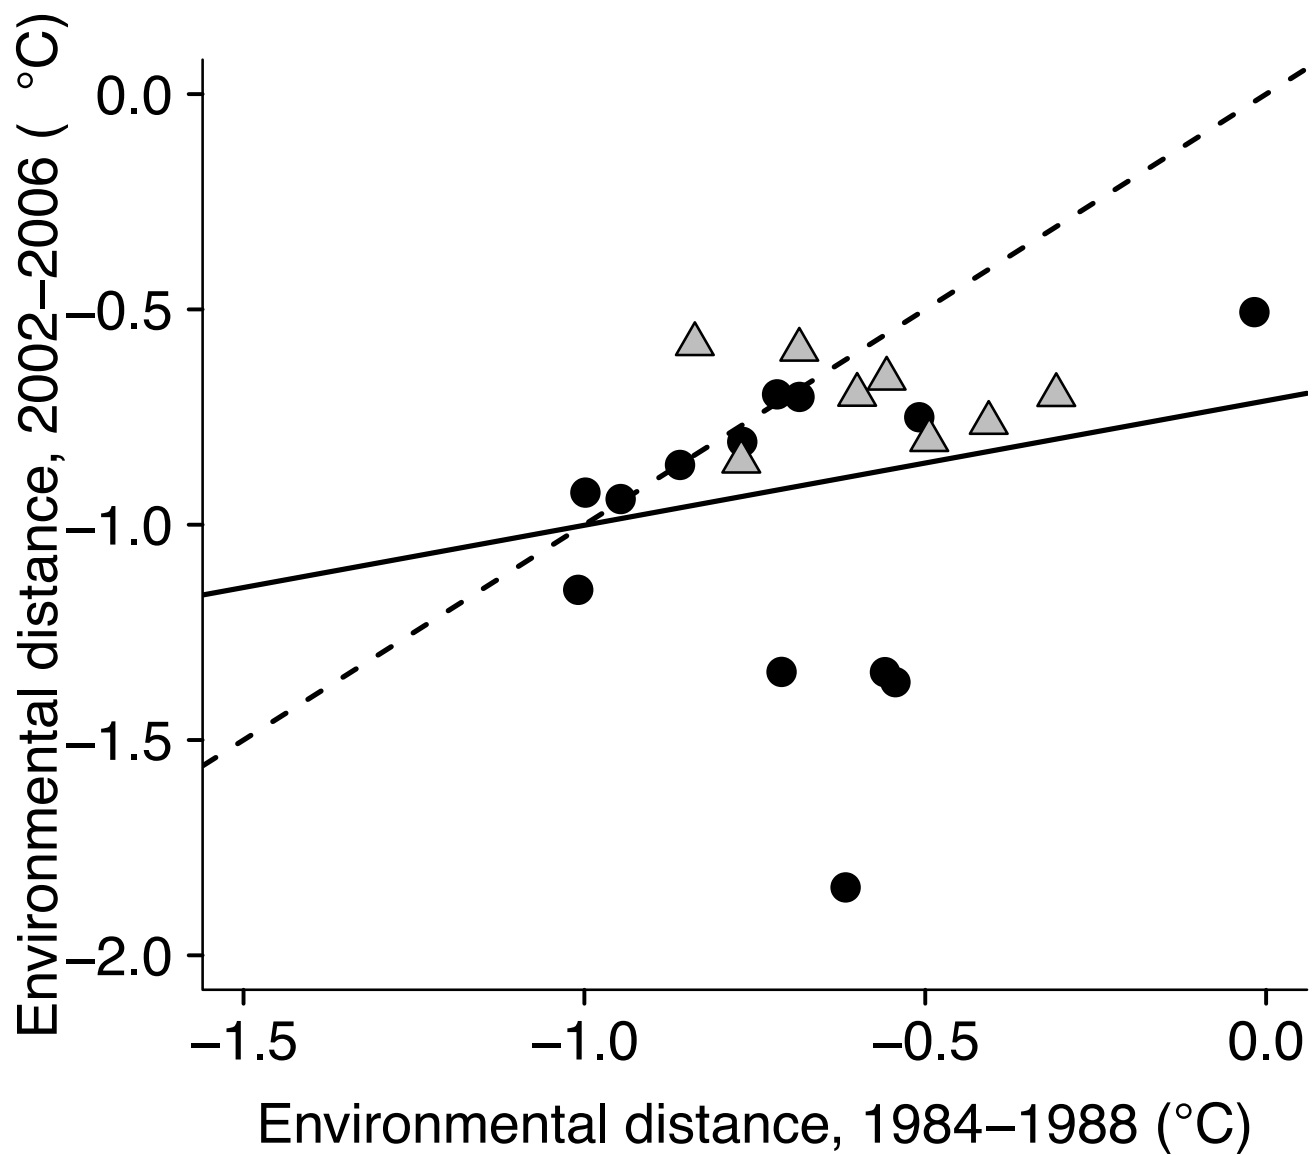

Figure S2d



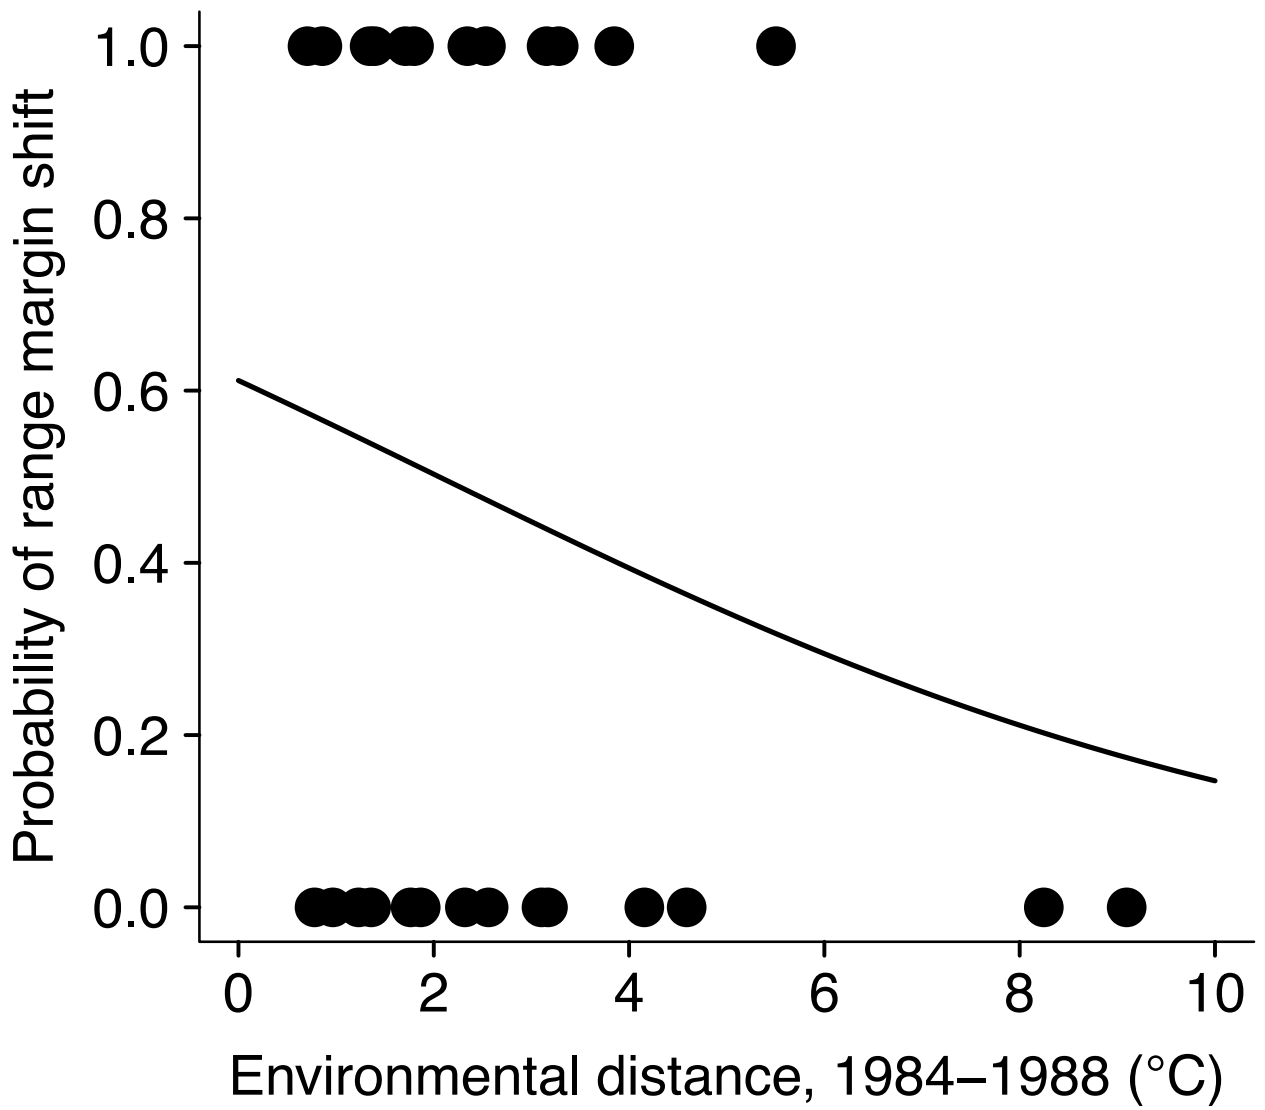

Figure S3a

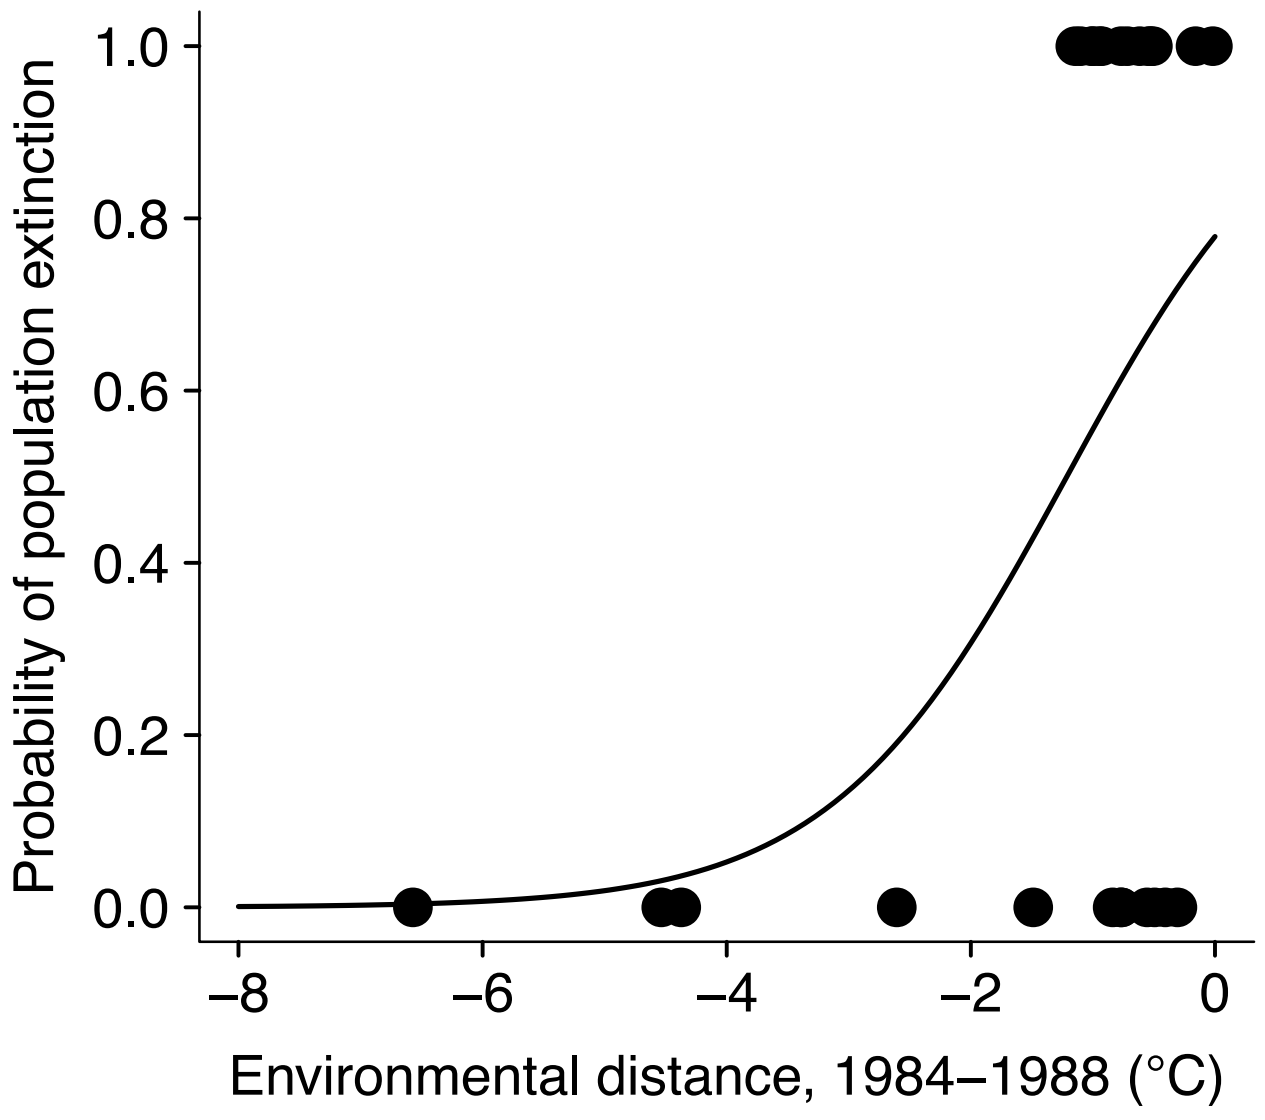

Figure S3b

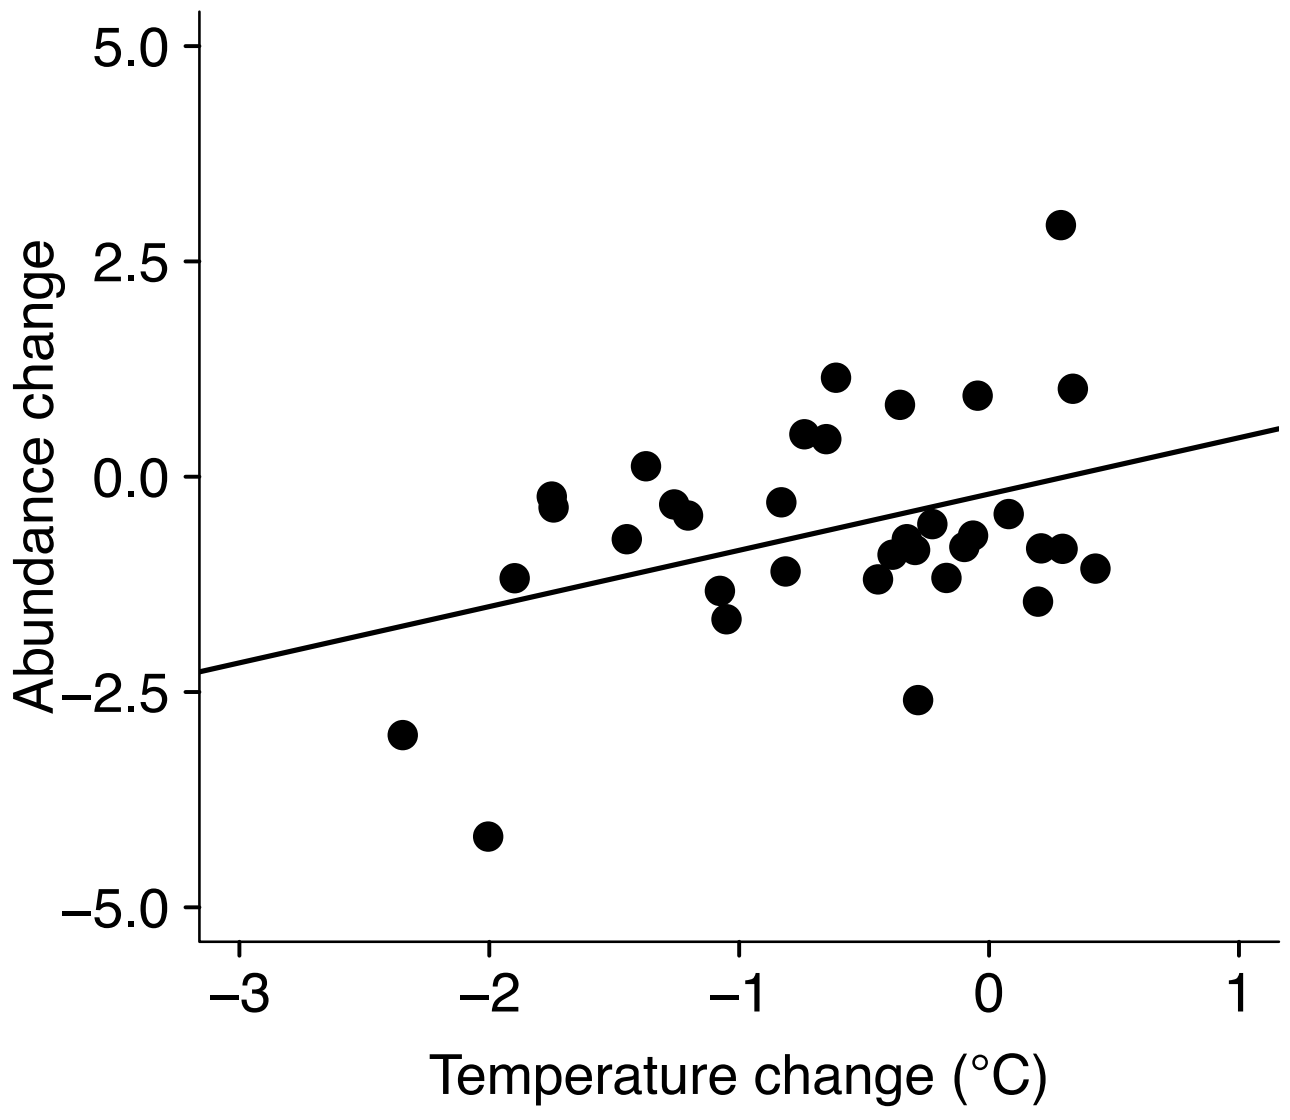

Figure S4a

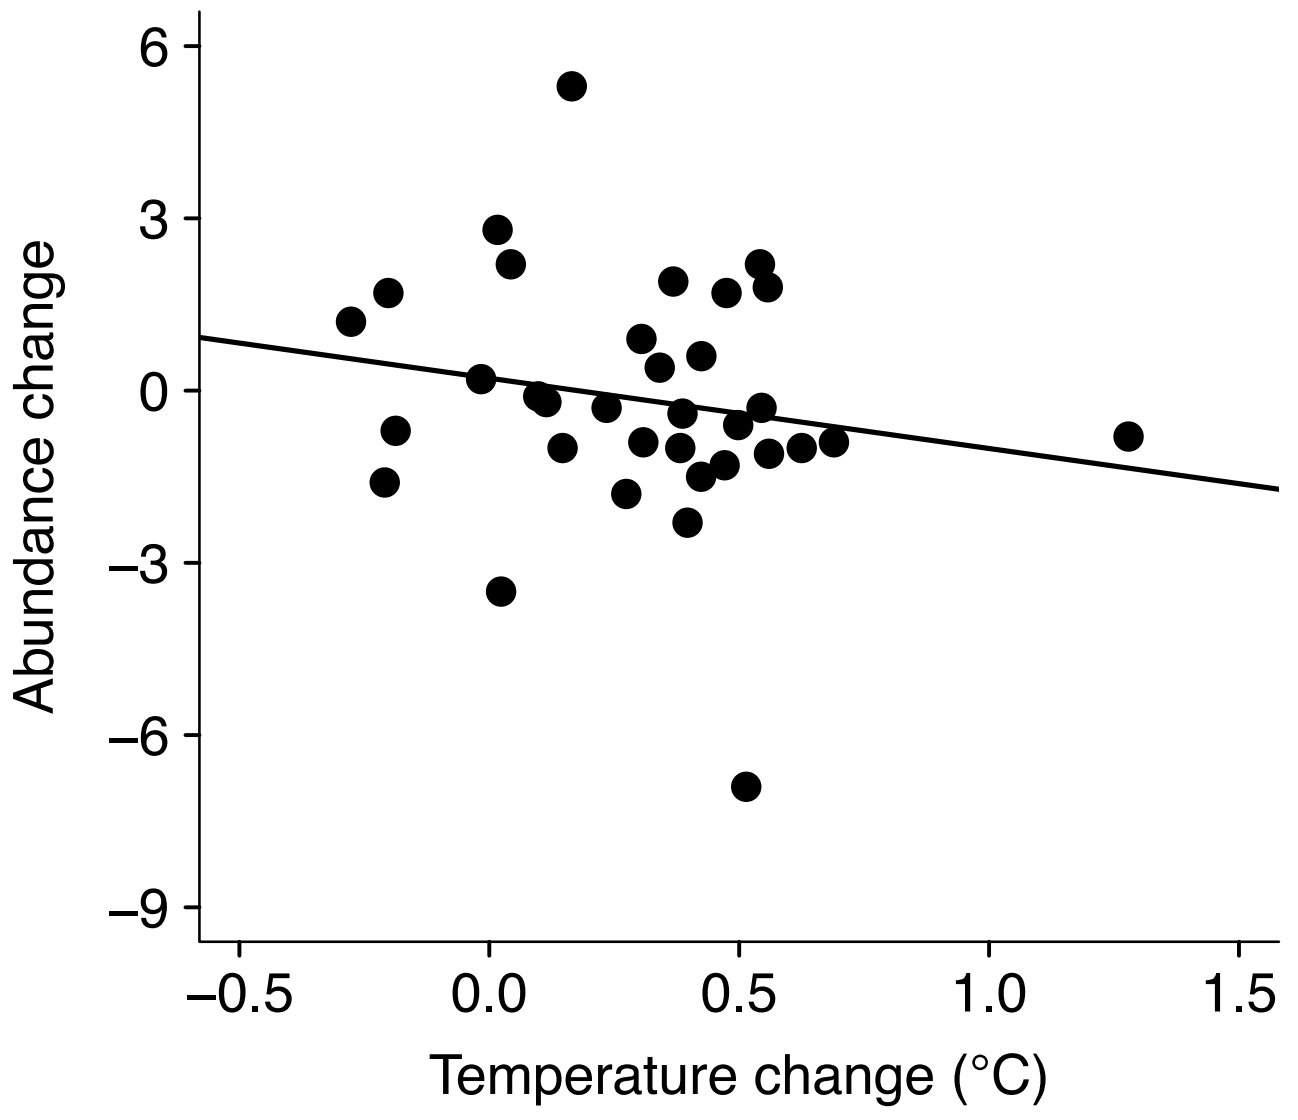

Figure S4b

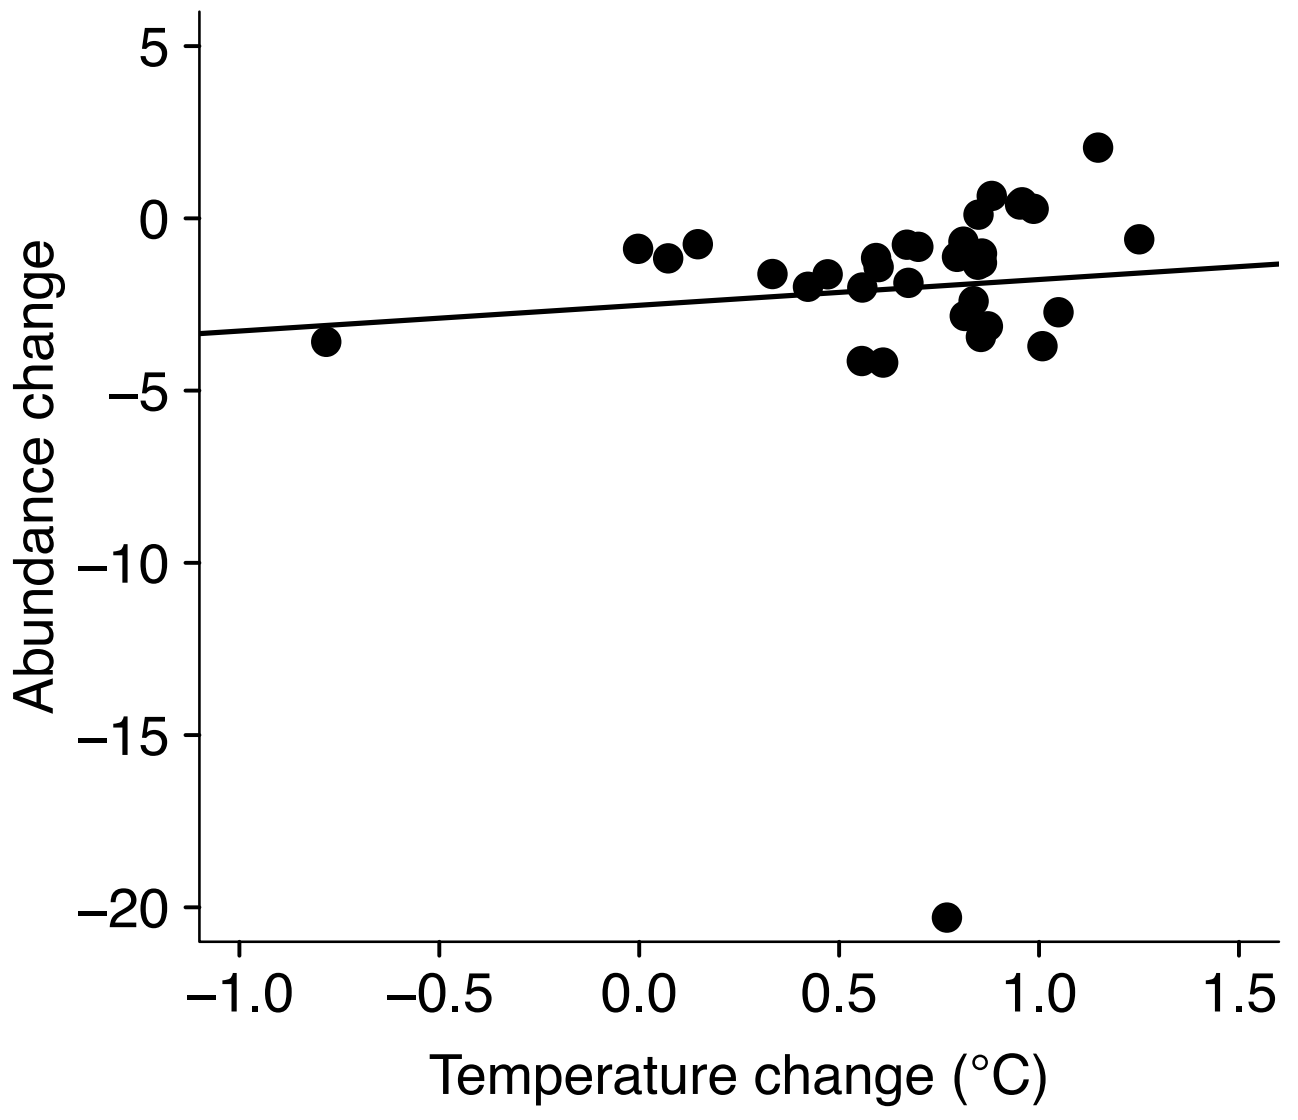

Figure S4c

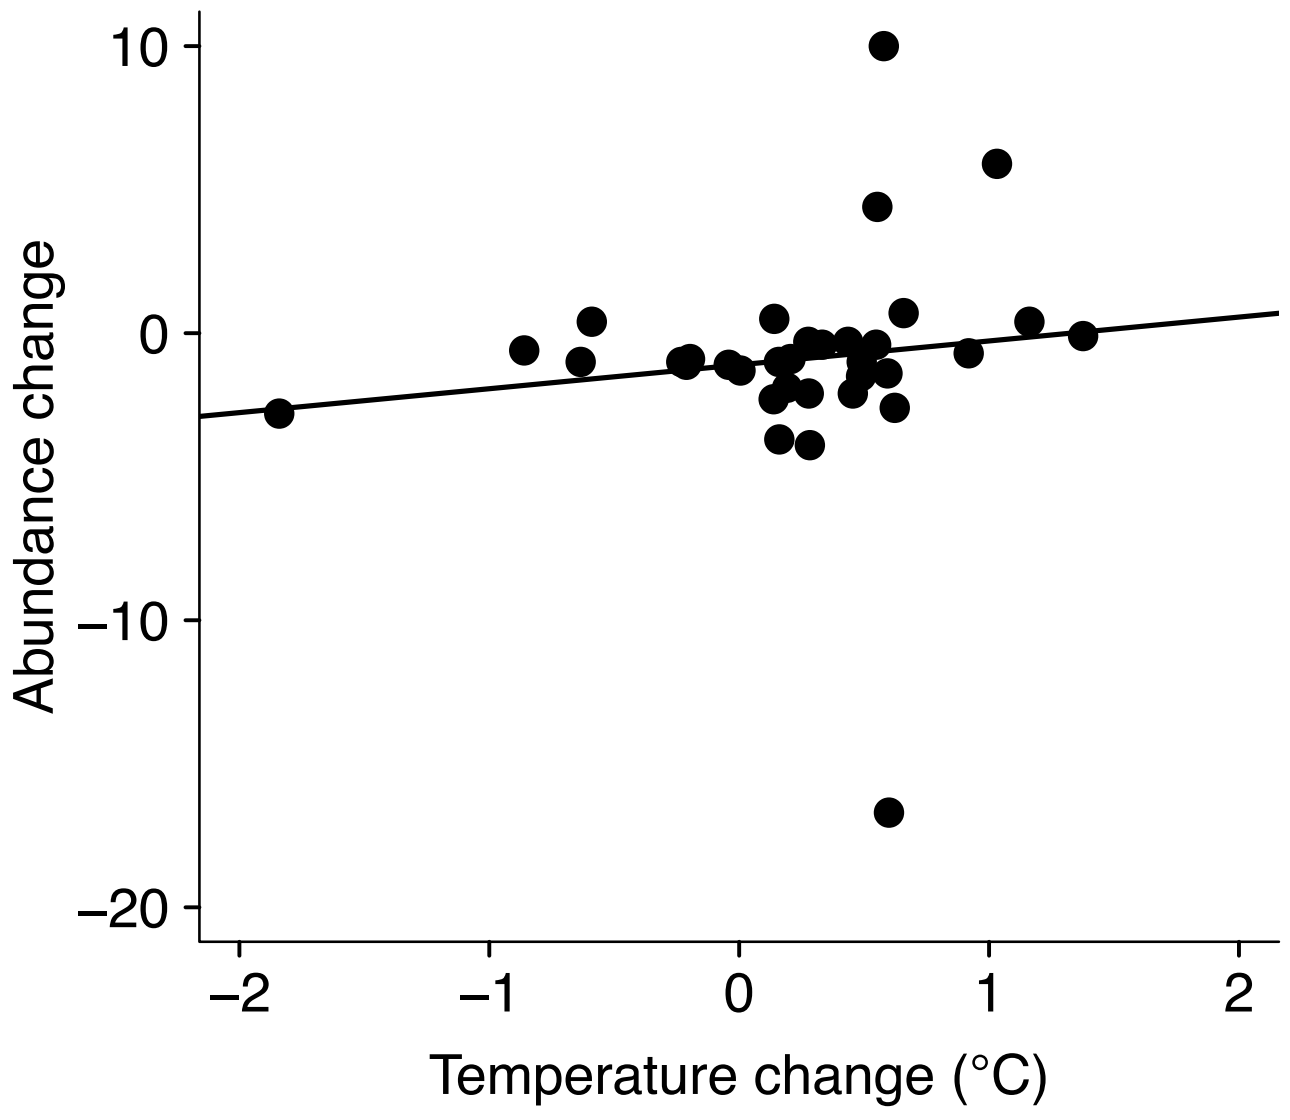

Figure S4d

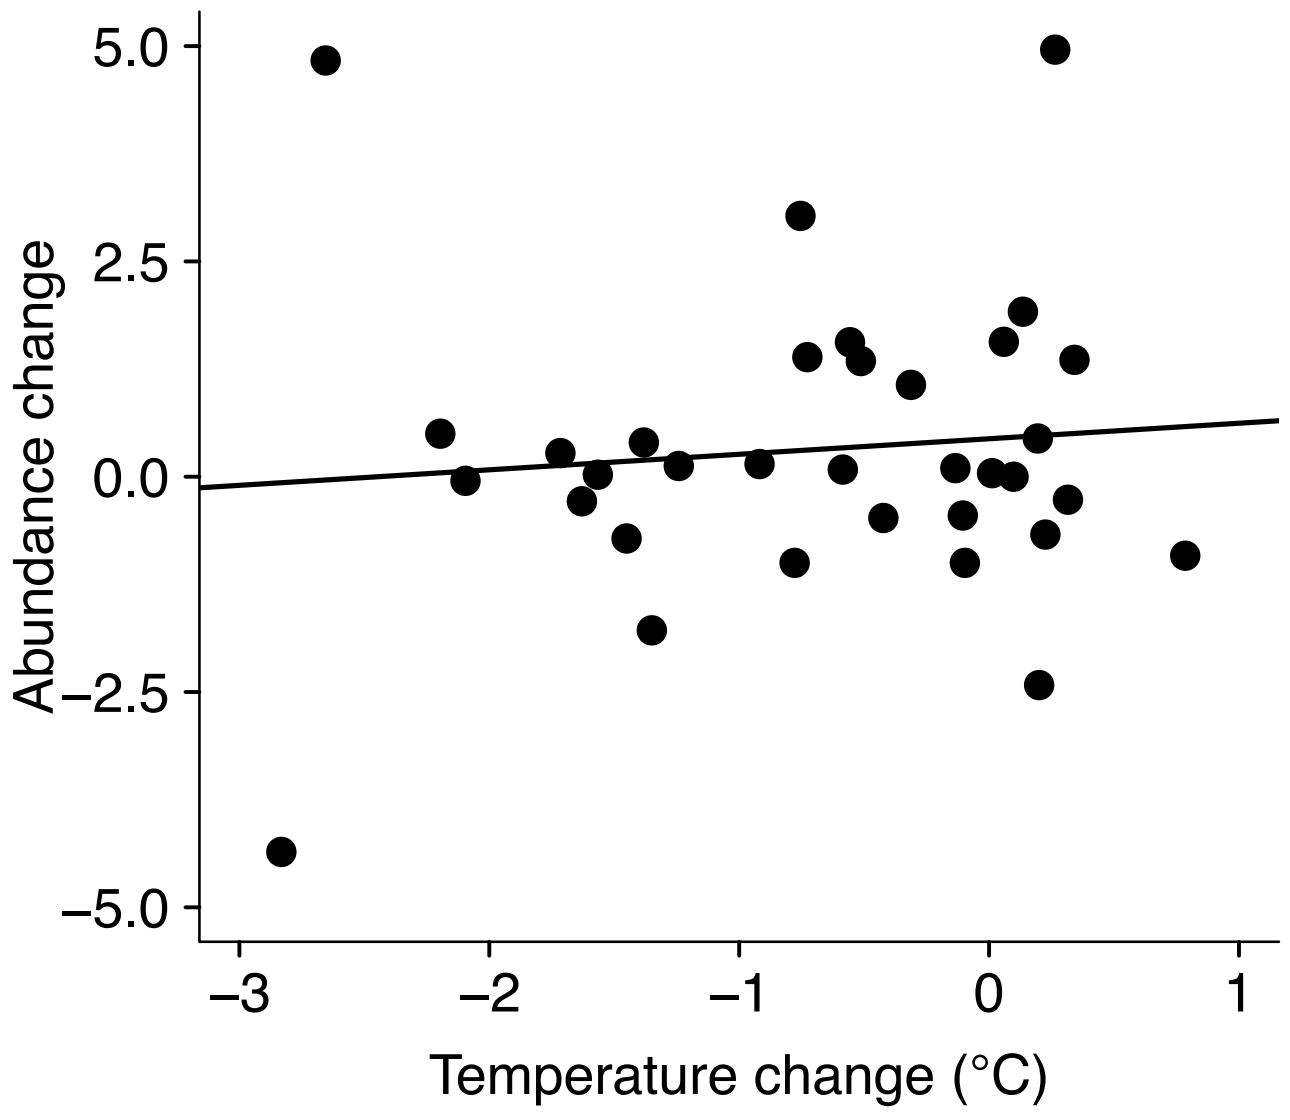

Figure S5a

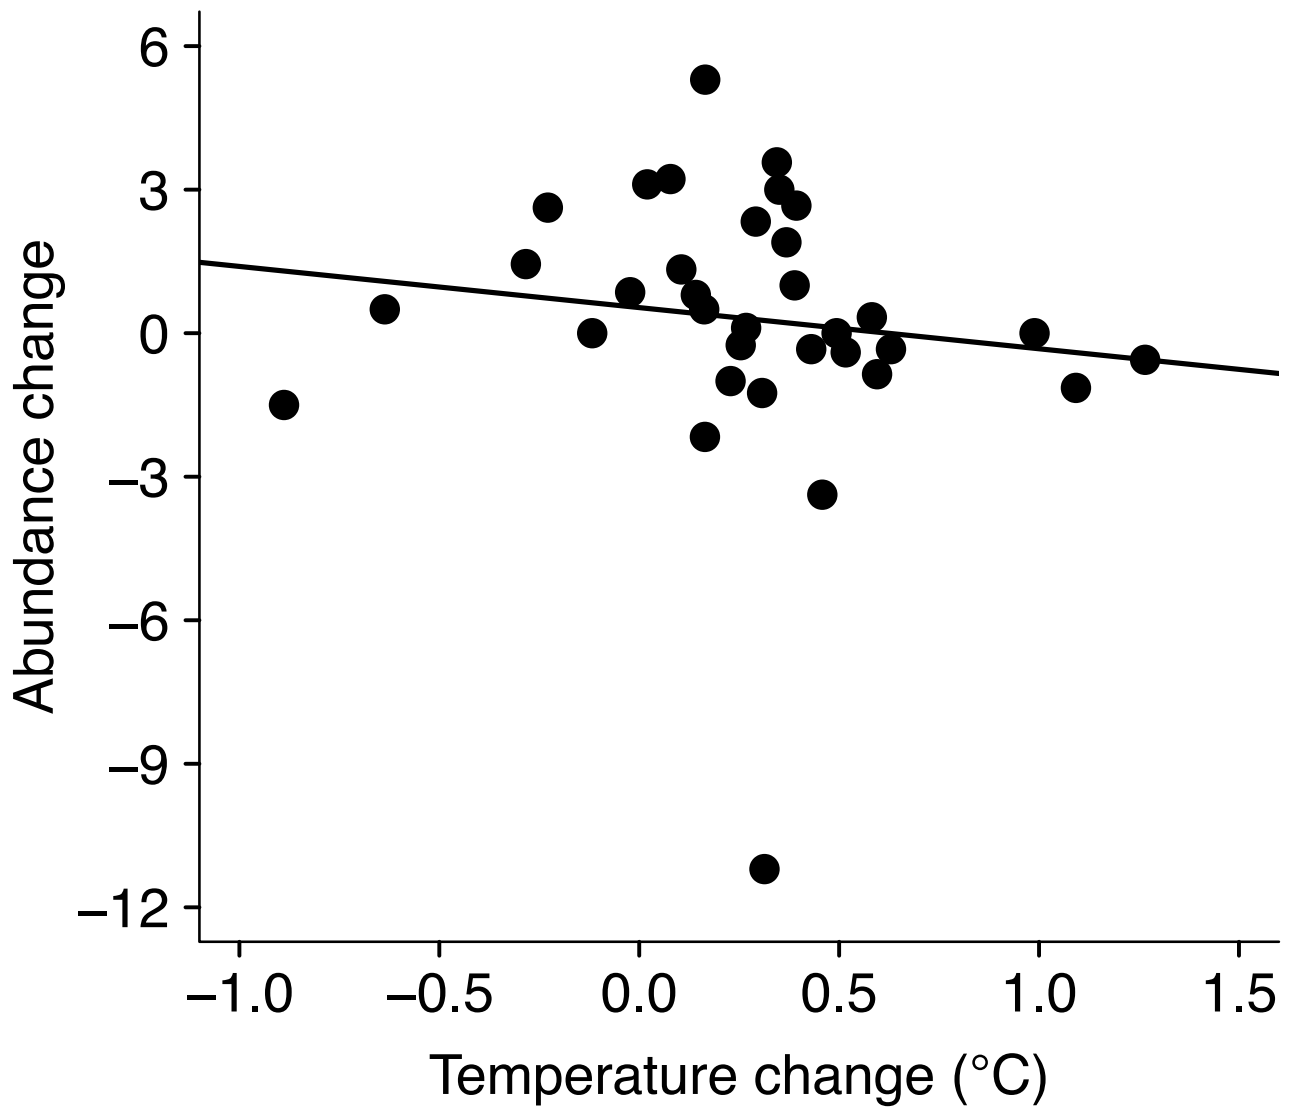

Figure S5b



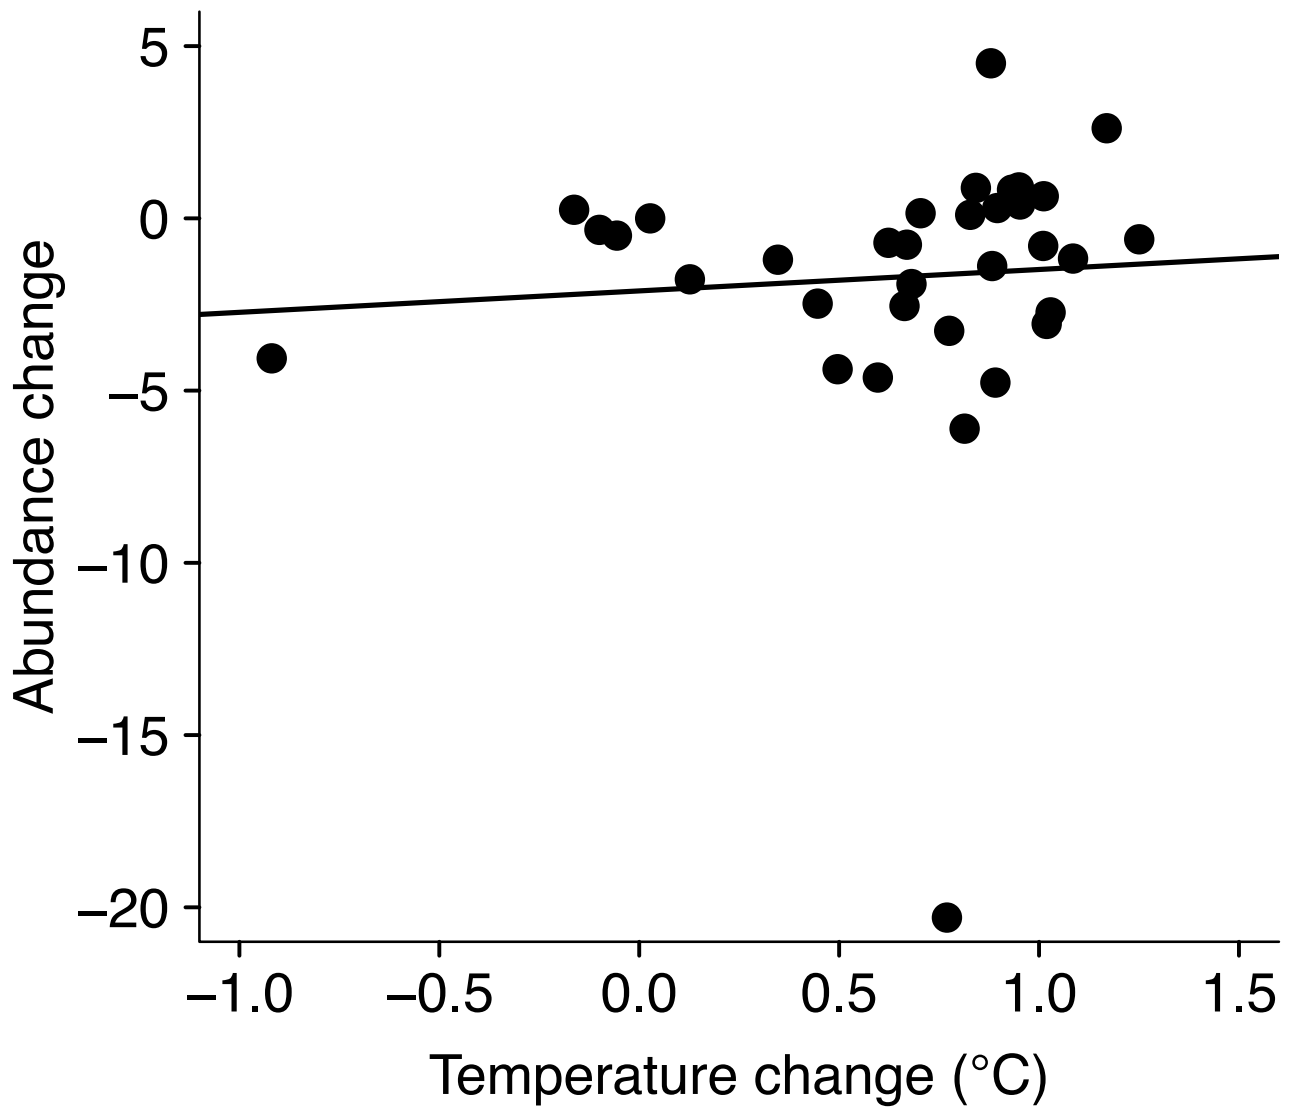

Figure S5c

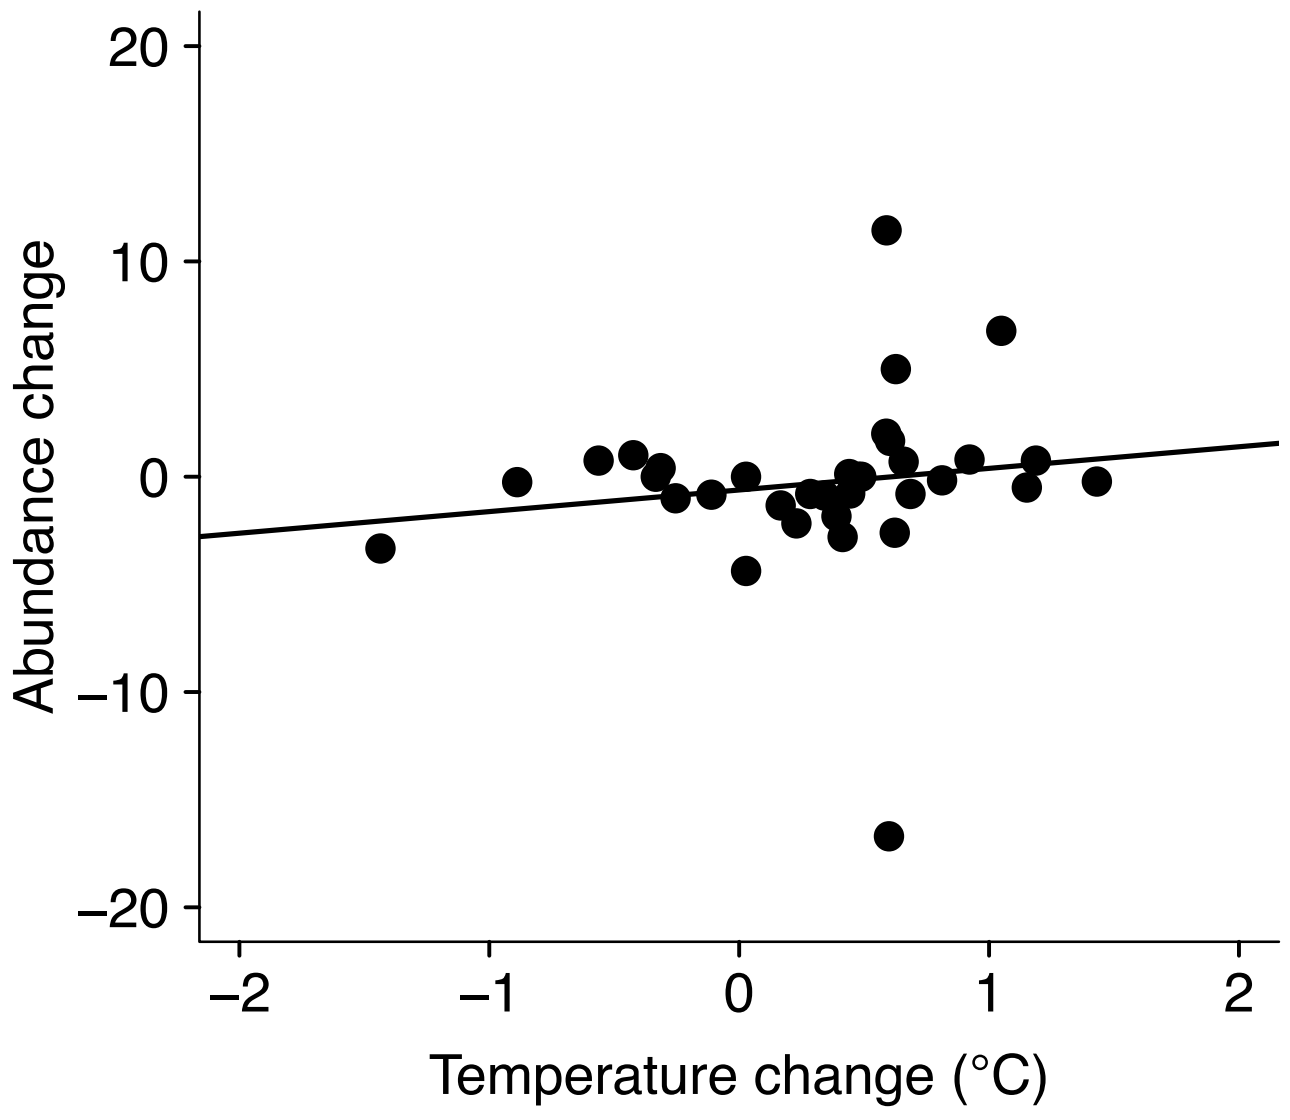

Figure S5d
